# Supplementary material for: Carbon-deposited TiO2nanoparticle balls for high-performance visible photocatalysis
Source: Royal Society of Chemistry journal article supplement (doi:10.1039/c4ra09988e), 2014-10-28
Supplement: c4ra09988e1.pdf [file c4ra09988e1.pdf]

**SUPPORTING INFORMATION**

**Carbon-deposited TiO<sub>2</sub> nanoparticle balls for high-performance  
visible photocatalysis**

Sunbok Lee,<sup>†</sup> Yu-Il Kang,<sup>†</sup> Su-Jin Ha, and Jun Hyuk Moon<sup>\*</sup>

Department of Chemical and Biomolecular Engineering, Sogang University, Seoul 121-  
742, South Korea.

<sup>†</sup>These authors contributed equally to this work.

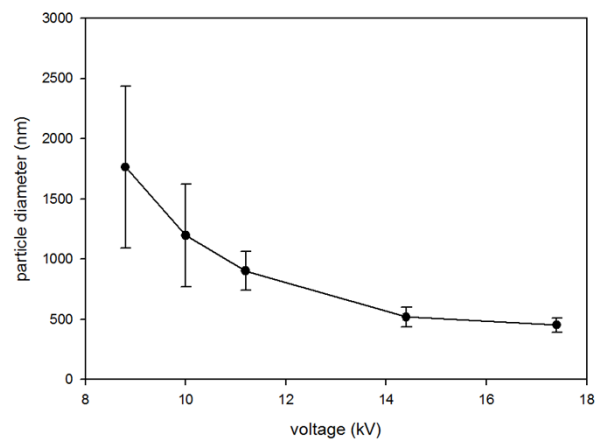

Figure S1. The diameters and size distributions of NP balls produced at various applied electric field voltages.

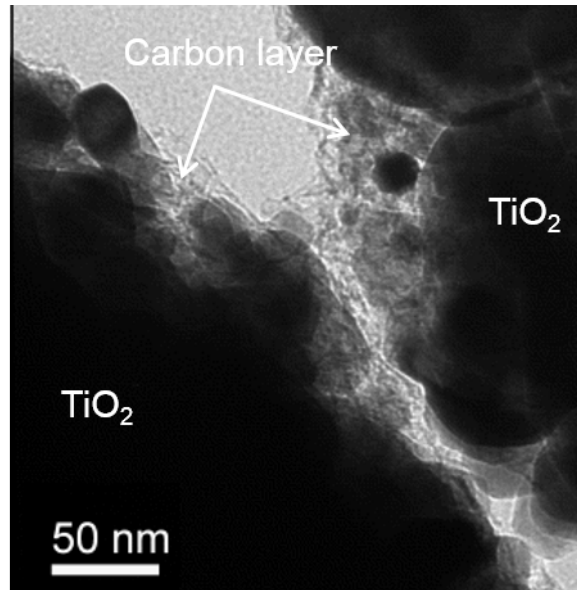

Figure S2. High resolution TEM image of carbon-coated NP balls.

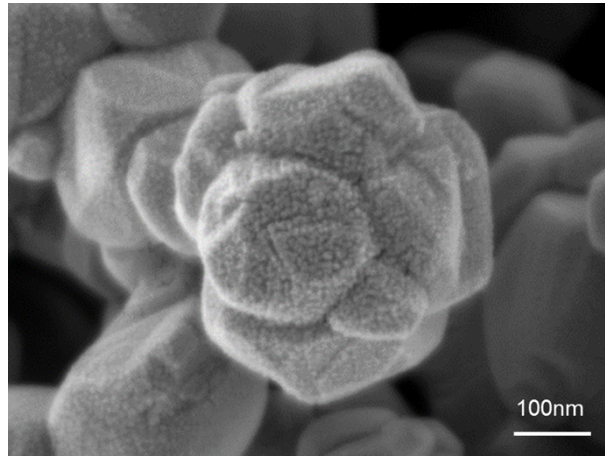

Figure S3. SEM image of bare  $\text{TiO}_2$  NP balls heat-treated at  $700^\circ\text{C}$ .

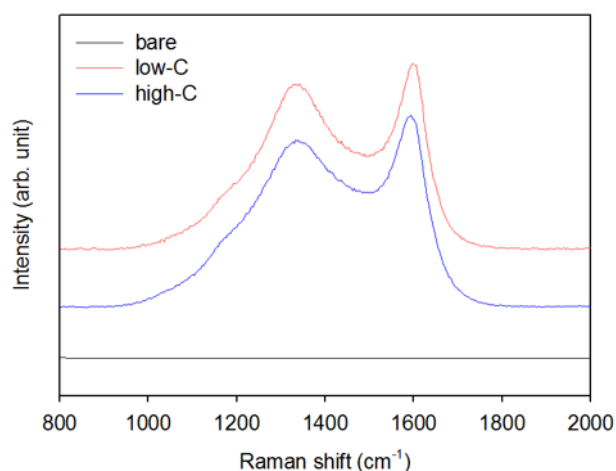

Figure S4. Raman spectra of the bare TiO<sub>2</sub> NP balls, low-C NP balls, and high-C NP balls. The D band corresponds to the A<sub>1g</sub> mode and is characteristic of in-plane disorder or edge defects in graphite, i.e., microcrystalline graphite, whereas the G band corresponds to the in-plane E<sub>2g</sub> vibrational mode of graphite sheets. The peak ratio of these bands can be used to qualitatively determine the graphitic crystal size. The ratio of the peak intensities of the D and G bands ( $I_D/I_G$ ) inversely depends on the in-plane crystallite size  $L_d$  according to the

Tuinstra-Koenig relation:

$$L_d = (2.4 \times 10^{-10}) \lambda^4 (I_D/I_G)^{-1}$$

where  $\lambda$  is the excitation wavelength. The  $I_D/I_G$  values of the bare, low-C, and high-C NP balls are 0.90, 0.89, and 0.87, respectively. The corresponding  $L_d$  values were 18.8 nm for the bare NP balls, 18.9 nm for the low-C NP balls, and 19.3 nm for the high-C NP balls.

Table S1. Comparative list of the decomposition rates of the C-NP balls with previous results

| Ref.                                      | Materials                                              | Exposure light source                                   | MB degradation quantity for 1hr (mmole hr <sup>-1</sup> g <sup>-1</sup> ) |
|-------------------------------------------|--------------------------------------------------------|---------------------------------------------------------|---------------------------------------------------------------------------|
| Our result                                | Carbon-doped TiO <sub>2</sub> Composite                | Xenon lamp (150W) (400~700nm)                           | 0.025                                                                     |
| Adv. Mater. 2012, 24, 1084–1088           | Graphene/TiO <sub>2</sub> Composite                    | Xenon lamp (450W) (>420nm)                              | 0.024                                                                     |
| Chem. Commun., 2012, 48, 2528–2530        | Nitrogen-doped TiO <sub>2</sub> Composite              | Xenon lamp (350W) (>410nm)<br>15mW/cm <sup>2</sup>      | 0.016                                                                     |
| J. Mater. Chem., 2011, 21, 1049–1057      | Carbon-doped TiO <sub>2</sub> sheet                    | Oriel mercury lamp (420~1000nm)<br>75mW/cm <sup>2</sup> | 0.0040                                                                    |
| J. Mater. Chem., 2012, 22, 17700–17708    | Molibden, Nitrogen co-doped TiO <sub>2</sub> sheet     | High pressure mercury lamp (250W) (>420nm)              | 0.0070                                                                    |
| RSC Adv., 2013, 3, 18474–18481            | Nitrogen, Graphene co-doped TiO <sub>2</sub> composite | Xenon lamp (500W) (>400nm)                              | 0.020                                                                     |
| Angew. Chem. Int. Ed. 2013, 52, 9196–9200 | Nitrogen-doped TiO <sub>2</sub> fiber                  | Xenon lamp (>420nm)                                     | 0.063                                                                     |
